# Supplementary material
Source: publisher site journal article supplement (https://www.dovepress.com/article/344782)
Supplement: Supplementary file 1 [file get_supplementary_file.php]

## Supplementary file 1

**The leadership structure at WCH**

| **Leadership** | **Meanings** |
| --- | --- |
| Heads of the hospital | Personnel who manage the hospital’s overall affairs and development |
| Heads of administrative departments/clinical departments/laboratories | Personnel authorized by the hospital leadership to be responsible for general affairs and the development of administrative departments/clinical departments/laboratories within the hospital |
| Deputy heads of administrative departments/clinical departments/laboratories | Personnel authorized by the hospital leadership to assist the head of their administrative department/clinical department/laboratory in managing the general affairs of their unit |
| Area leaders of administrative departments/clinical departments/laboratories | Personnel authorized by the hospital leadership to assist the head of their administrative department/clinical department/laboratory in managing a certain portion of the affairs within the unit |
| Leaders of professional teams | Personnel authorized by the heads of their administrative department/clinical department/laboratory; they have expertise in a particular aspect of each field of medicine, teaching, research, and management, and lead a number of staff in relevant work in their unit |

Abbreviation: WCH, West China Hospital of Sichuan University.

## Supplementary file 2

**Demographic characteristics of the pilot study participants and their comments**

| No. | Gender | Age | Job | Educational level | Whether the questionnaire was well laid out | Whether the questions were clearly stated | Whether the questions were easy to answer | Whether the classification criterion was reasonable | comments |
| --- | --- | --- | --- | --- | --- | --- | --- | --- | --- |
| 1 | Female | 38 | Nurse | College | 5 | 5 | 4 | 4 | No special comments |
| 2 | Male | 51 | Medical technician | College | 4 | 5 | 4 | 4 | Examples of the risks can be added to the questionnaire to illustrate |
| 3 | Female | 33 | Nurse | Master | 4 | 4 | 5 | 5 | You can ask about what is the personal reason for corruption and what is people want to learn about anti-corruption to promote interest in learning |
| 4 | Female | 25 | Officer | Master | 5 | 5 | 5 | 5 | No special comments |
| 5 | Female | 42 | Nurse | college | 5 | 5 | 5 | 4 | Different colors can be used to highlight the focus of each question |
| 6 | Female | 31 | Nurse | Ph.D | 4 | 5 | 4 | 5 | No special comments |
| 7 | Male | 33 | Officer | Master | 5 | 4 | 4 | 4 | Replace character style with professional conduct |
| 8 | Male | 33 | Doctor | Ph.D | 5 | 5 | 5 | 5 | No special comments |
| 9 | Female | 45 | Doctor | Master | 4 | 5 | 4 | 5 | No special comments |
| 10 | Female | 25 | Officer | Master | 5 | 5 | 5 | 4 | No special comments |
| 11 | Female | 35 | Doctor | Ph.D | 5 | 5 | 4 | 5 | Leadership-related information should be added to the basic information, and the impact of leadership characteristics on the risk of corruption should be analyzed |
| 12 | Male | 44 | Medical technician | Master | 5 | 4 | 5 | 5 | No special comments |

## Supplementary file 3

**Analysis of participants' CRPI with different personal characteristics (N=5,525)**

| **Category** | **Groups** | **N** | **M(QL, QU)** | **U** | **H** | ***P*** |
| --- | --- | --- | --- | --- | --- | --- |
| Gender | male | 1654 | 7.68(6.20, 8.93) | 2794928.500 |  | 0.000a** |
| female | 3871 | 7.09(5.78, 8.41) |
| Age | ＜30 | 1367 | 7.00(5.72, 8.32) |  | 87.637 | 0.000b** |
| 30-39 | 2828 | 7.13(5.84, 8.46) |
| 40-49 | 825 | 7.78(6.26, 9.15) |
| ≥50 | 503 | 7.81(6.43, 9.00) |
| years of work experience | ＜10 years | 2914 | 7.15(5.83, 8.45) |  | 70.543 | 0.000b** |
| 10-19 years | 1713 | 7.11(5.84, 8.51) |
| 20-29 years | 520 | 7.86(6.22, 9.33) |
| ≥30 years | 378 | 7.87(6.64, 8.95) |
| Unit type | Administration department | 1260 | 7.25(6.18, 8.36) |  | 0.618 | 0.734**b** |
| Clinical department | 4010 | 7.29(5.75, 8.68) |
| Laboratory | 255 | 7.21(6.12, 8.27) |
| Professional title | Junior and below | 3472 | 6.95(5.78, 8.32) |  | 178.635 | 0.000b** |
| Mid-level | 1399 | 7.48(5.92, 8.67) |
| Senior | 654 | 8.20(6.92, 9.54) |
| Occupation | doctor | 992 | 8.00(6.42, 9.28) |  | 136.925 | 0.000b** |
| nurse | 2317 | 6.89(5.53, 8.33) |
| Pharmacist | 544 | 7.60(6.01, 8.62) |
| Therapist | 644 | 7.44(6.10, 8.67) |
| Administrator | 829 | 7.20(6.12, 8.34) |
| Research and teaching staff | 199 | 7.21(6.00, 8.47) |
| Leadership | yes | 1029 | 7.73(6.22, 9.10) | 2012206.500 |  | 0.000a** |
| no | 4496 | 7.17(5.86, 8.46) |

Notes: aThe statistical values are associated with Mann-Whitney U rank-sum test, bthe statistical values are associated with Kruskal-Wallis H rank-sum test, **indicates P＜0.01.

Abbreviation: CRPI, corruption risk perception index.

## Supplementary file 4

**Analysis of participants' CRPI with different personal characteristics (N=5,525)**

| **Category** | **Groups** | **N** | **M(QL,QU)** | **U** | **H** | ***P*** |
| --- | --- | --- | --- | --- | --- | --- |
| Gender | male | 315 | 8.33(7.08, 9.58) | 103123.000 |  | 0.003a* |
| female | 714 | 7.44(5.95, 8.81) |
| Age | ＜30 | 16 | 6.34(5.33, 8.54) |  | 15.809 | 0.001b* |
| 30-39 | 444 | 7.05(5.70, 8.32) |
| 40-49 | 368 | 8.06(6.64, 9.50) |
| ≥50 | 201 | 8.22(7.05, 9.54) |
| years of work experience | ＜10 years | 108 | 7.32(5.94, 8.67) |  | 13.790 | 0.003b* |
| 10-19 years | 458 | 7.48(6.00, 8.82) |
| 20-29 years | 295 | 8.00(6.42, 9.48) |
| ≥30 years | 168 | 8.13(6.85, 9.30) |
| Unit type | Administration department | 132 | 8.00(6.78, 8.96) |  | 7.807 | 0.020b* |
| Clinical department | 879 | 7.68(6.07, 9.15) |
| Laboratory | 18 | 7.41(6.52, 8.69) |
| Professional title | Junior and below | 209 | 6.83(5.58, 8.11) |  | 15.483 | 0.000b** |
| Mid-level | 422 | 7.43(5.78, 8.75) |
| Senior | 398 | 8.40(7.21, 9.77) |
| Occupation | doctor | 323 | 8.46(7.22, 9.81) |  | 27.249 | 0.000b** |
| nurse | 543 | 7.16(5.67, 8.45) |
| Pharmacist | 13 | 8.05(7.83, 8.96) |
| Therapist | 46 | 7.89(6.57, 9.13) |
| administrator | 91 | 8.08(6.92, 8.91) |
| Research and teaching staff | 13 | 7.02(5.17, 8.21) |
| Number of leadership titles | 1 | 928 | 7.67(6.16, 9.05) | 42241.500 |  | 0.021a* |
| ≥2 | 101 | 8.08(6.82, 9.56) |
| Position grade | Heads of the hospital | 8 | 13.17(9.02, 15.19) |  | 38.762 | 0.000b** |
| Heads of administrative departments/clinical departments/laboratories | 96 | 8.83(7.59, 10.60) |
| Deputy heads of administrative departments/clinical departments/laboratories | 60 | 8.82(7.70, 9.80) |
| Area leaders of administrative departments/clinical departments/laboratories | 91 | 7.95(6.33, 8.82) |
| Leaders of professional teams | 774 | 7.42(5.96, 8.84) |
| Length of leadership | ＜10 years | 574 | 7.63(6.17, 8.96) |  | 9.061 | 0.028b* |
| 10-19 years | 257 | 7.89(6.16, 9.24) |
| ≥20 years | 64 | 8.15(6.87, 9.76) |

Notes: aThe statistical values are associated with Mann-Whitney U rank-sum test, bthe statistical values are associated with Kruskal-Wallis H rank-sum test, **indicates *P*＜0.01, *indicates *P*＜0.05.

Abbreviation: CRPI, corruption risk perception index.
